# Supplementary material for: Structural and Quantitative Characterization of Mucin-Type O-Glycans and the Identification of O-Glycosylation Sites in Bovine Submaxillary Mucin
Source: MDPI journal article supplement (doi:10.3390/biom10040636), 2020-04-20
Supplement: s1 [file s1]

Article-Supplementary Materials

# Structural and Quantitative Characterization of Mucin-type O-glycans and the Identification of O-glycosylation Sites in Bovine Submaxillary Mucin

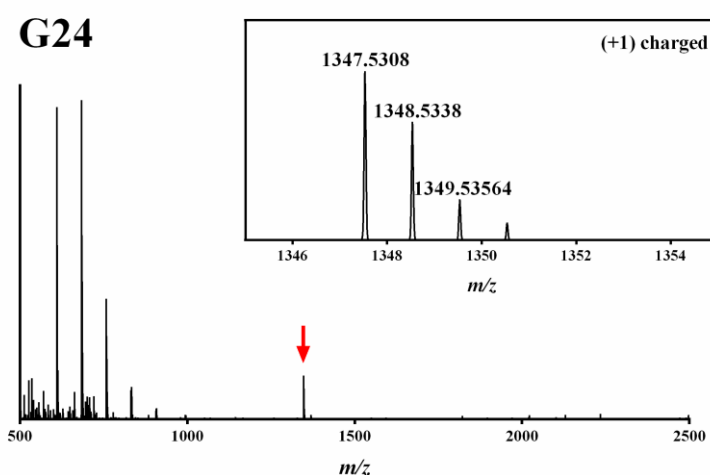

**Figure S1.** Precursor ion of G24 (theoretical  $m/z = 1347.5309$ ) in the HCD-MS spectrum (full mass scan mode).

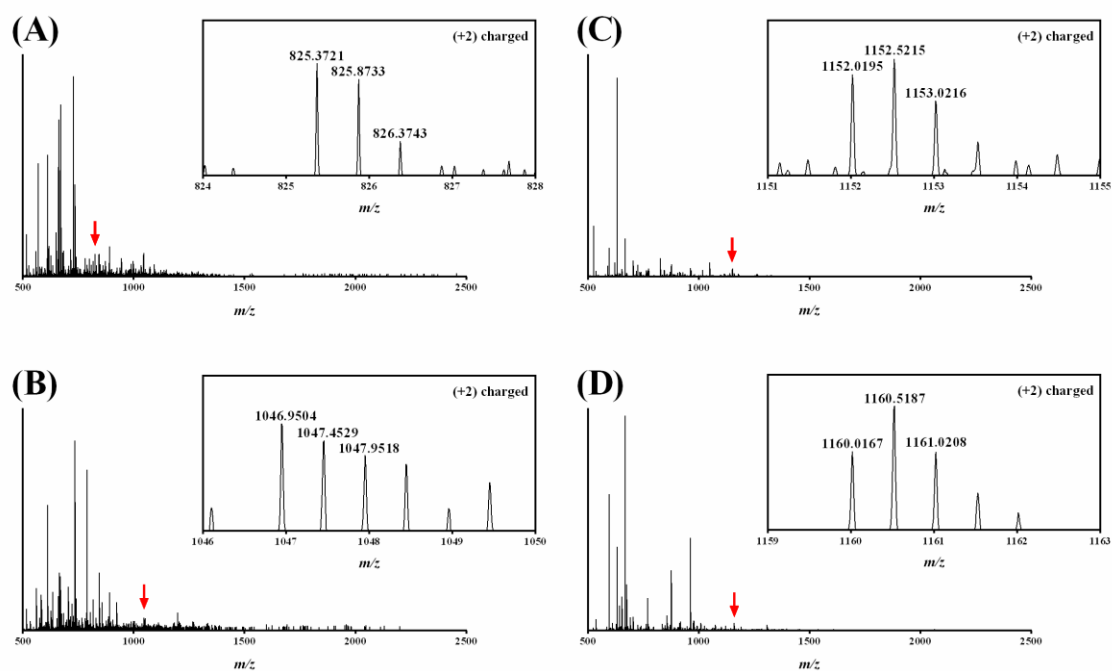

**Figure S2.** Precursor ions of (A) GP8 (theoretical  $m/z = 825.3721$ ), (B) GP9 (theoretical  $m/z = 1046.9504$ ), (C) GP12 (theoretical  $m/z = 1152.0195$ ), and (D) GP16 (theoretical  $m/z = 1160.0167$ ) in the HCD-MS spectrum (full mass scan mode).
